# Supplementary material
Source: publisher site journal article supplement (https://www.dovepress.com/get_supplementary_file.php?f=492065.docx)
Supplement: Supplementary file 1 [file get_supplementary_file.php]

Supplementary Table S1 STROBE-MR checklist of recommended items to address in reports of Mendelian randomization studies

| **Item No.** | **Section** | **Checklist item** |
| --- | --- | --- |
| 1 | **TITLE and ABSTRACT** | Association of sleep traits, physical activity, and sedentary leisure behavior with female reproductive health: a two-sample Mendelian randomization analysis  Abstract  **Background:** Living habits affect female endocrine function and fertility, along with aging and other life factors. Because of this, female reproductive health can be promoted through living habit adjustment.  **Methods:** We used two-sample Mendelian randomization analysis with summary datasets from a genome-wide association study to investigate the causal relationships between sleep traits, sedentary leisure behavior, physical activity, and reproductive health traits in women, calculating odds ratios (ORs) and 95% confidence intervals (CIs). Exposure genetic instruments were used for variants that were significantly related to traits. The inverse-variance weighted (IVW) method was used for the main analysis, and we also performed MR-Egger and weighted median analyses to supplement the sensitivity test. Horizontal pleiotropy was detected using the MRE intercept and MR-PRESSO methods, and heterogeneity was assessed using Cochran’s Q statistics, IVW, and MR-Egger.  **Results:** Insomnia showed a significant inverse causal association with endometriosis [OR (95% CI) IVW = 1.80 (1.16, 2.80), *P* = 0.009] and abnormal menstruation [OR (95% CI) IVW = 2.37 (1.34, 4.20), *P* = 0.003]. Sleep duration was negatively related to menopause age(beta IVW = −0.034, *P* = 0.001), and long sleep duration could be a protective factor of endometriosis[OR (95% CI)IVW = 0.07 (0.01, 0.72), *P* = 0.024]. Strenuous sports were also negatively correlated with female infertility [OR (95% CI) IVW = 0.10 (0.02, 0.68), *P* = 0.019]. Sensitivity analysis revealed no signs of horizontal pleiotropy or heterogeneity.  **Conclusion:** Our findings suggest that insomnia is an adverse factor correlated with endometriosis and abnormal menstruation and that longer sleep duration protects against endometriosis. Adequate sleep and regular schedules may decrease the risk of endometriosis and abnormal menstruation, helping improve the reproductive health of women. |
|  | **INTRODUCTION** |  |
| 2 | **Background** | Many genetic and environmental factors affect female reproductive health (1). Multiple lifestyle factors can be modified to enhance overall well-being and reproductive health; they are ultimately under each individual’s control (2). A recent study investigated whether sleeping habits, physical activity, and lifestyle affect reproductive health, which is a topic of great concern (3).  In women, sleep affects reproductive health, and sleep disorders can emerge during the reproductive stage (4). Sleep changes over time in women and with alterations in hormone levels associated with the menstrual cycle and menopause (5). There also appears to be a relationship between sleep traits and female reproductive health; poor sleep is associated with menstrual cycle irregularity (6), sleep dysregulation may result in infertility, and circadian dysrhythmia is linked to the altered secretion of reproductive hormones (7–9).  It has been proven that reductions in daily physical activity are the primary causes of many chronic diseases and that physical activity is a rehabilitative treatment for inactivity-caused dysfunctions (10). There is emerging evidence that physical activity and sedentary lifestyles in both females and males can influence reproductive and assisted reproductive technology success (11,12). In women, increased physical activity and decreased sedentary behavior may improve fertility by maintaining body weight and hormone levels (13). In contrast, high levels of physical activity can inhibit ovulation, leading to decreased fertility; however, little is known about whether sedentary leisure behavior is causally related to reproductive capacity (14,15).  Mendelian randomization (MR) uses single-nucleotide polymorphisms (SNPs) as genetic instruments to estimate the causal effects of exposure on certain outcomes (17). According to Mendel's law, alleles with genetic variation are randomly separated during gametophytogenesis and fertilization, making them independent of confounding factors (18). This allows bypassing of possible and potential biases from confounding and reverse causation and strengthens causal inference in exposure–outcome associations.  Previous MR studies have demonstrated the significant impact of smoking initiation and alcohol and coffee consumption on female reproductive health (19). However, no robust evidence has been provided to support the correlation between sleep traits, sedentary leisure behavior, physical activity, and female reproductive health traits. |
| 3 | **Objectives** | Here, we employed a two-sample MR approach to investigate the association of these three lifestyle behaviors with reproductive traits and abnormal menstrual phenotypes, to provide evidence for aiding the management of female reproductive health. Using female reproductive health factors as outcomes, we focused on common infertility diseases such as polycystic ovarian syndrome (PCOS), endometriosis, and female infertility (16). This study also assessed sex hormones (total testosterone (TT), bioavailable testosterone (bio-T), estradiol (E2), and anti-Müllerian hormone (AMH)) and menstrual phenotypes (menopausal age and irregular menstrual cycle/bleeding). |
|  | **METHODS** |  |
| 4 | **Study design and data sources** | Study design In this study, sleep traits (sleep duration, long sleep duration, short sleep duration, and insomnia), physical activity (moderate-to-vigorous physical activity (MVAP), vigorous physical activity (VAP), and strenuous sports) and sedentary leisure behavior (television watching, computer use, driving) were used as exposure factors. Single nucleotide polymorphism (SNP) loci significantly associated with the above exposure factors were selected as instrumental variables (IVs); the outcome variables were PCOS, endometriosis, female infertility, abnormal menstruation, menopause age, bioT, TT, E2, and AMH. The causal association analysis between exposure and outcome was performed using a two-sample MR analysis based on a publicly available genome-wide association study (GWAS) database of large samples. Correlation analysis MR analysis relies on three fundamental assumptions (20)(21). The initial assumption posits a robust correlation between IVs and sleep traits, sedentary leisure behavior, and physical activity (22). The assumption of independence denotes that IVs and the outcome variable (female reproductive health) remained uncorrelated with any other confounding factors (23). The last assumption assumes that IVs can solely impact female reproductive health by modulating these life factors without the involvement of any additional pathways (Fig. 1).  To identify suitable IVs, we selected SNPs displaying strong associations as IVs. Rigorous screening and clumping of significant SNPs (p < 5e-08) for sleep traits and physical activity (p < 5e-07) were performed for sedentary behavior (24). Linkage disequilibrium (LD) LD indicates that genetic variants in close proximity tend to be inherited together, resulting in a greater likelihood that alleles from two or more loci will co-occur on a single chromosome. The screening criteria were as follows kb > 10 000 bp and R2 < 0.01. To eliminate weak IVs, the F-statistic was used to assess their strength. When the F-value was less than ten, the IV was classified as weak, whereas an F-value greater than ten indicates a strong IV. The F-value and R2 (proportion of variance explained by the SNPs in the exposed database) were calculated using the following formulas:  R2 is the proportion of variance explained by the SNPs in the exposed database, EAF is the effect allele frequency, beta is the allele effect value, and SD is the standard deviation. MR analysis Three main methods were employed to determine the causal relationship between exposure factors and reproductive health outcomes: inverse variance weighting (IVW), MR-Egger regression, and weighted median. The "Two-Sample MR" package in R language was used to visualize MR results with scatter, forest, and sensitivity analysis plots. Typically, the IVW method results are the primary gauge of MR analysis reliability, with a significance threshold of *P* < 0.05 indicating a positive outcome (25). The F-value of the SNPs was calculated using the R package "Mendelian Randomization.”  For the reliability of the final analysis results, the following screening criteria were used as filters for robust significant causality: IVW mainly suggested a significant causal relationship, the directions of the MR analysis results (beta values) were consistent among the three methods, and there was no heterogeneity or horizontal pleiotropy among the IVs. If the IVs meet the assumptions, the results were considered unbiased, and the standard error was less than that with the IVW. The main results with causal significance and without heterogeneity or pleiotropy are shown in forest plots, whereas the others are shown in the supplementary table. Sensitivity analysis The IVW and MR-Egger tests were used to assess heterogeneity, with a significance level of *P* < 0.05, indicating the presence of heterogeneity in the studies. In cases where the IV influences the outcome through factors other than the exposure variable, it indicates the presence of pleiotropy. Pleiotropy can undermine the assumptions of independence and exclusivity as assessed using the MR-Egger intercept test. A *P*-value < 0.05 indicated the presence of pleiotropy in the data. We employed the "leave-one-out" method to conduct a sensitivity analysis. This approach entails systematically removing the results associated with individual SNPs, assessing whether they are outliers, and observing the stability of the results after the removal of each SNP. Additionally, a funnel plot was used to assess the symmetry of the SNPs and evaluate the reliability of the results (26). |
|  | **RESULTS** | The main results are presented in the text without heterogeneity or pleiotropy where the IVW suggested a significant causal relationship. We did not find a significant relationship between sedentary leisure behavior and female reproductive health. Physical activity might influence female sex hormones, though strong heterogeneity and pleiotropy were always present. IV screening A total of 67 SNPs in "insomnia" displayed robust associations with “endometriosis” and “abnormal menstruation.” Additionally, "long sleep duration" displayed ten SNPs associated with “endometriosis” and six associated with “long sleep duration” and “menopause age.” A total of six SNPs in "strenuous sports" demonstrated a robust association with female infertility. No weak IVs or confounding factors were detected in our analysis. MR analysis We assessed the causal relationship between exposure factors and outcomes using IVW, MR-Egger regression, and weighted medians. The results showed that insomnia [odds ratio [OR] (95% confidence interval [CI]) IVW = 1.80 (1.16, 2.80), *P* = 0.009] was associated with endometriosis (Figure 2A) and abnormal menstruation [OR (95% CI) IVW = 2.37 (1.34, 4.20), *P* = 0.003; OR (95% CI) WM=2.64(1.24, 5.62), *P* = 0.012, respectively] (Figure 2B).  In addition, the IVW analysis suggested a positive association between long sleep duration and endometriosis [OR (95% CI) IVW = 0.07 (0.01, 0.72), *P* = 0.024; OR (95% CI) WM=0.02 (0.00, 0.30), *P* = 0.004] (Figure 2C). The long sleep duration initiation SNP IVW analysis showed potential causality for a positive effect on menopause age [beta (95% CI) IVW= -5.33 (0.00, 0.13), *P* = 0.001; beta WM=0.02, 95% CI = (0.00, 0.86), *P* = 0.042] (Figure 2D) after eliminating two SNPs with pleiotropy (rs55938136, rs3785884). Strenuous sports in women had a similar negative causality with female infertility [OR (95% CI) IVW = 0.1 (0.02, 0.68), *P* = 0.019; OR (95% CI) WM = 0.04 (0.00, 0.37), *P* = 0.004] (Figure 2E). Sensitivity analysis We employed MR-Egger regression and IVW to assess the presence of heterogeneity; the results were *P* > 0.05, indicating the absence of heterogeneity. Subsequently, Egger regression was adopted to study whether directional pleiotropy existed. The results had *P* > 0.05 for all data sets, indicating that directional pleiotropy did not exist in any dataset.  The funnel plot displays a symmetric distribution of SNPs, underscoring the relative stability of the results. A “leave-one-out” approach was employed to evaluate the influence of individual SNPs, and the results showed no significant impact on the effect size. |
|  | **DISCUSSION** | This study aimed to examine the causal relationship between sleep traits, physical activity, leisure sedentary behavior, and female reproductive health by utilizing publicly available large-sample GWAS data and conducting MR analysis using R. Most concomitant endometriosis symptoms, including dysmenorrhea, chronic pelvic pain, female infertility, and dyspareunia, are well-recognized; however, little attention has been given to insomnia symptoms (9). Studies have provided strong evidence that individuals with symptomatic endometriosis experience higher levels of sleep disturbance than those without (27,28), and a significant positive correlation exists between poor sleep quality and the intensity of dysmenorrhea or pelvic pain (22,29). Some authors have speculated that chronic pelvic pain or fatigue could potentially act as mediating factors in endometriosis and sleep disturbances.  In this study, a causal relationship between insomnia and endometriosis (OR (95% CI) IVW = 1.80 (1.16, 2.80); *P* = 0.009) was identified. Insomnia may be a risk factor for endometriosis, which adds weight to a previous study that revealed a significant association between night shift work, changes in sleep patterns during days off, and the risk of endometriosis (30). Additionally, long sleep duration was identified as a protective factor against endometriosis [OR (95% CI) IVW = 0.07 (0.01, 0.72), *P* = 0.024]. It is well known that endometriosis can impair sleep by increasing sleep disturbances and decreasing sleep duration and that long sleep might potentially prevent endometriosis. However, it is also possible that women with long sleep durations were more likely to escape endometriosis. Patients with insomnia are more likely to suffer from endometriosis, and those with endometriosis have a higher incidence of sleep disturbances. Collectively, these studies suggest a bidirectional relationship between sleep traits and endometriosis, possibly owing to changes in the immune or gynecologic endocrine systems (31). The chronic estrogen-dependent nature of endometriosis intensifies hormonal changes that may play a role in sleep disruption (32). One study demonstrated that hormonal treatment improved sleep disturbance but not sleep quality, daytime sleepiness, or insomnia (23); however, other studies have contradictory findings, and the mechanisms behind the effects of sleep traits on endometriosis require further investigation.  The association between sleep traits and the menstrual cycle has scarcely been studied. In this study, insomnia was found to have a positive causal relationship with abnormal uterine and vaginal bleeding (OR (95% CI), IVW = 2.37 (1.34, 4.20), p = 0.003), which is in agreement with a former systematic review (33). In a cross-sectional study, sleep duration and irregular menstrual cycles were significantly inversely correlated (34). One longitudinal study found that insomnia more than doubled the risk of menstrual cycle irregularity over a year; these associations became more predominant as the Insomnia Severity Index score increased (35). Individuals with sleep disturbances usually do not have regular circadian rhythms, which may be related to the irregular synthesis and secretion of female gonadal hormones. Sleep disorders inhibit gonadotropin-releasing hormone production in the pituitary gland, resulting in the reduced secretion of gonadal hormones (36,37). Lower estradiol levels and follicle-stimulating hormone levels are related to lower sleep variation, and luteinizing hormone pulse frequency is inhibited by sleep, showing a significant relationship between hormones and sleep traits, demonstrating the activation of the HPA axis (38–40). Consequently, during the activation of the HPA axis, corticotropin-releasing hormone inhibits gonadotropin-releasing hormone secretion, leading to hypothalamic amenorrhea (41). Female reproductive functions such as folliculogenesis, ovulation, menstruation, hormone synthesis, and secretion can be hindered by sleep deprivation, sleep disruption, and complex molecular genetics, and hormonal pathways play an important role in regulating these relationships (42). Similarly, sleep problems may exacerbate gynecological conditions; however, we found no relationship between short sleep duration and an abnormal menstrual cycle, in contrast to many other studies (43,44). In this study, we did not find evidence that rigorous exercise was a risk factor for menstrual cycle irregularities (45).  Long sleep duration had negative causality with menopause age [beta (95% CI) IVW= -5.33 (0.00, 0.13), *P* = 0.001]. Sleep disturbance is a common condition during menopause transition (21). Regardless of sex, older adults exhibit poorer sleep consolidation than younger adults and menopausal transition causes poor sleep beyond the anticipated age-related effects (46). One study also found that short sleep duration was significantly associated with a later onset of menopause (30), possibly owing to the levels of neuroendocrine hormones. Cognitive behavioral therapy is the first-line treatment for insomnia in the general population; however, when vasomotor symptoms are present, menopausal hormone therapy should be considered (47).  We observed a modest and significant genetic correlation between strenuous exercise and infertility [OR (95% CI) IVW = 0.1 (0.02, 0.68), *P* = 0.019]. Physically active females were more likely to be fertile, which is consistent with a previous observational study that reported that more females with normal fertility engaged in moderate to vigorous activity (14). However, other conservative studies have revealed that among females, excessive exercise may generally cause levels of engagement in physical activity to vary across individuals, and high levels of physical activity among females could result in an energy deficit, leading to hypothalamic amenorrhea, causing short-term infertility, and ultimately hindering fertility (48).  One of the strengths of this study was that it leveraged a large sample of GWAS data, enhancing the reliability of the findings. Potential biases were also effectively mitigated through association analysis, LD analysis, elimination of weak IVs, and controlling for confounding factors. Additionally, a symmetrical distribution of SNPs was observed in the funnel plot, and both the pleiotropy and “leave-one-out” tests demonstrated the relative stability of the results. Despite this, there were also several limitations. We acknowledge that heterogeneity may originate from variations in analysis platforms, experimental conditions, population characteristics, and other IVs, even though both the MR-Egger regression and IVW methods yielded results with P-values > 0.05; consequently, a more comprehensive investigation of the sources of heterogeneity is warranted. This study also focused primarily on European populations, resulting in a paucity of GWAS data on Asian and African populations. The number of IVs for the SNPs within each dataset in this study was also relatively modest; is necessary to use large sample datasets to expand the pool of SNPs available as IVs for subsequent analyses. Additionally, although we employed MR to explore the causal relationship between exposure and outcomes, we did not investigate the underlying mechanisms.  In conclusion, our study suggests that insomnia and endometriosis might have reciprocal causations, and long sleep duration is a protective factor against endometriosis. It has also been genetically predicted that insomnia is a risk factor for abnormal uterine and vaginal bleeding. Improving sleep quality and prolonging sleep duration are potential intervention targets for the prevention of endometriosis and vaginal bleeding to improve female reproductive health. |
|  | **OTHER INFORMATION** |  |
| 14 | **Funding** | This work was supported by grants from the Science and Technology Commission of Shanghai Municipality (22Y11906100) to Jing Sun and the Shanghai Outstanding Academic Leaders Plan to Jing Sun (Year 2019). |


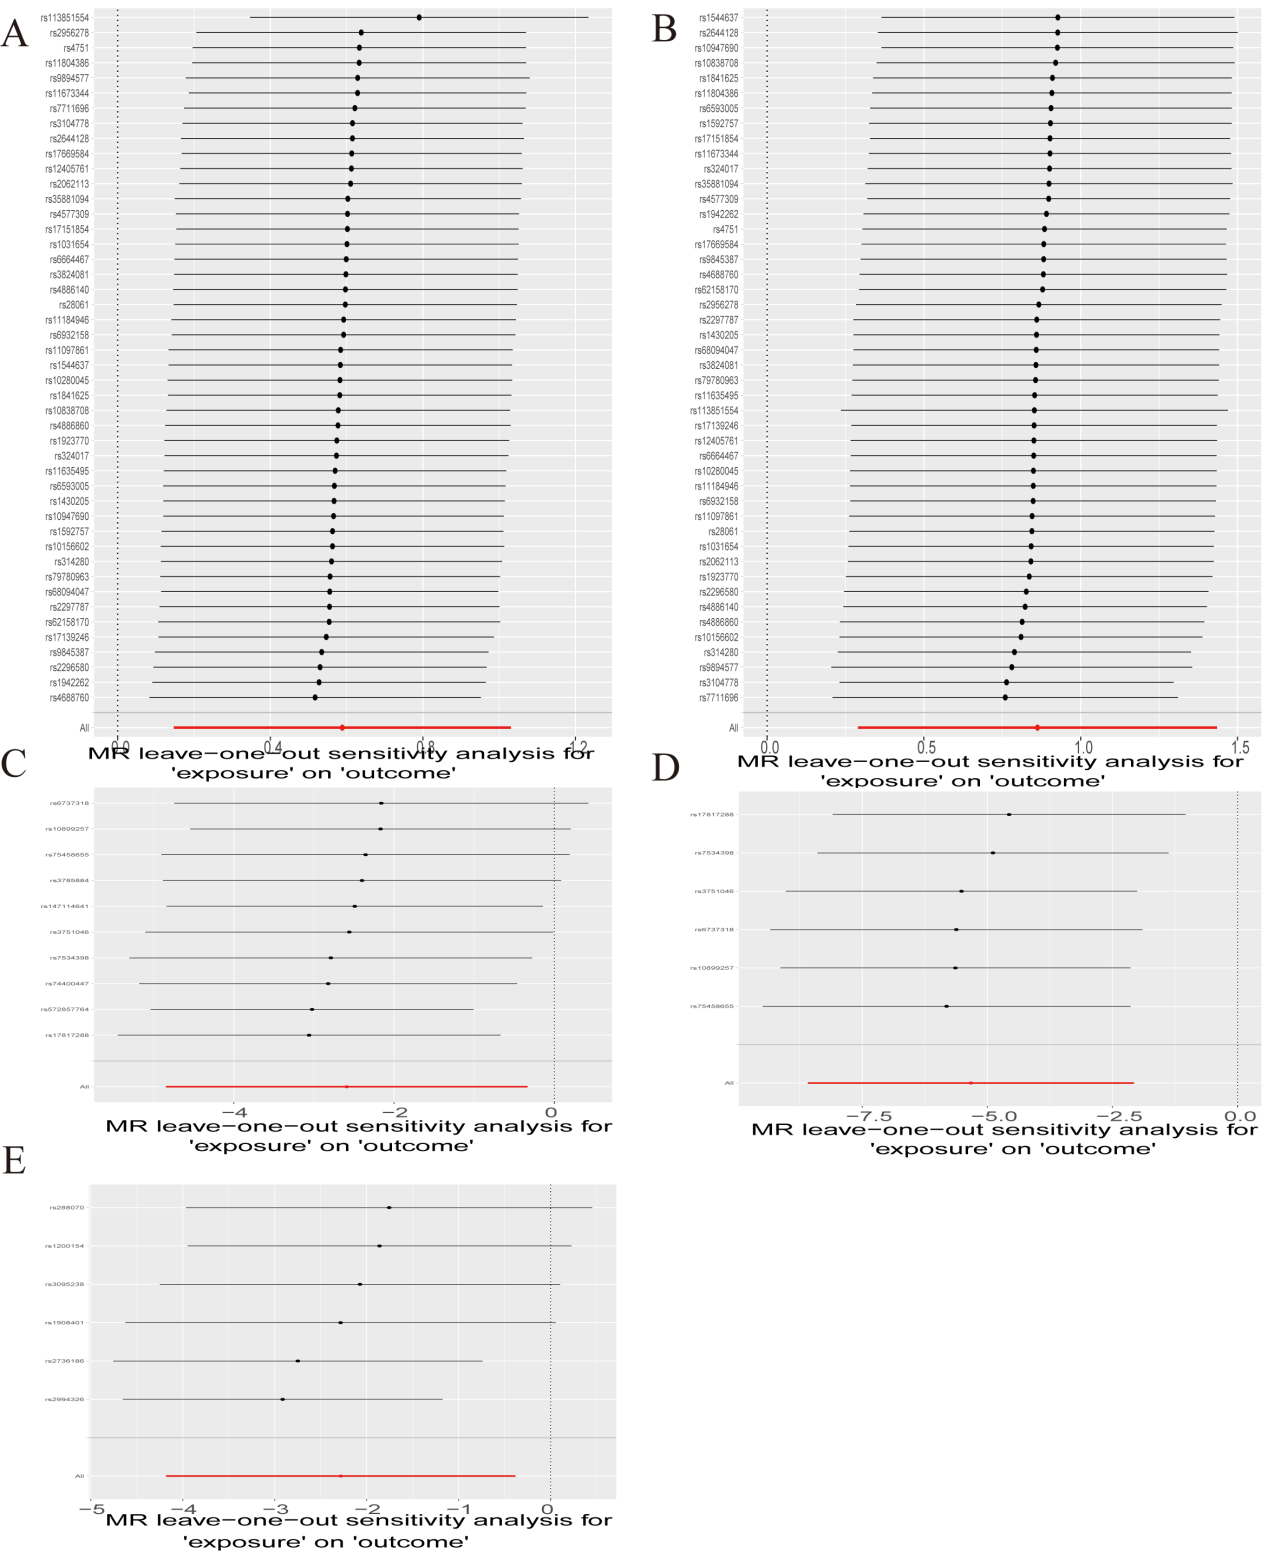


Figure S1 "Leave-one-out” forest map of the causal relationship A:insomnia and endometriosis. B: insomnia and abnormal menstruation. C: long sleep duration and endometriosis. D: long sleep duration and menopause age. E:strenuous sports and female infertility


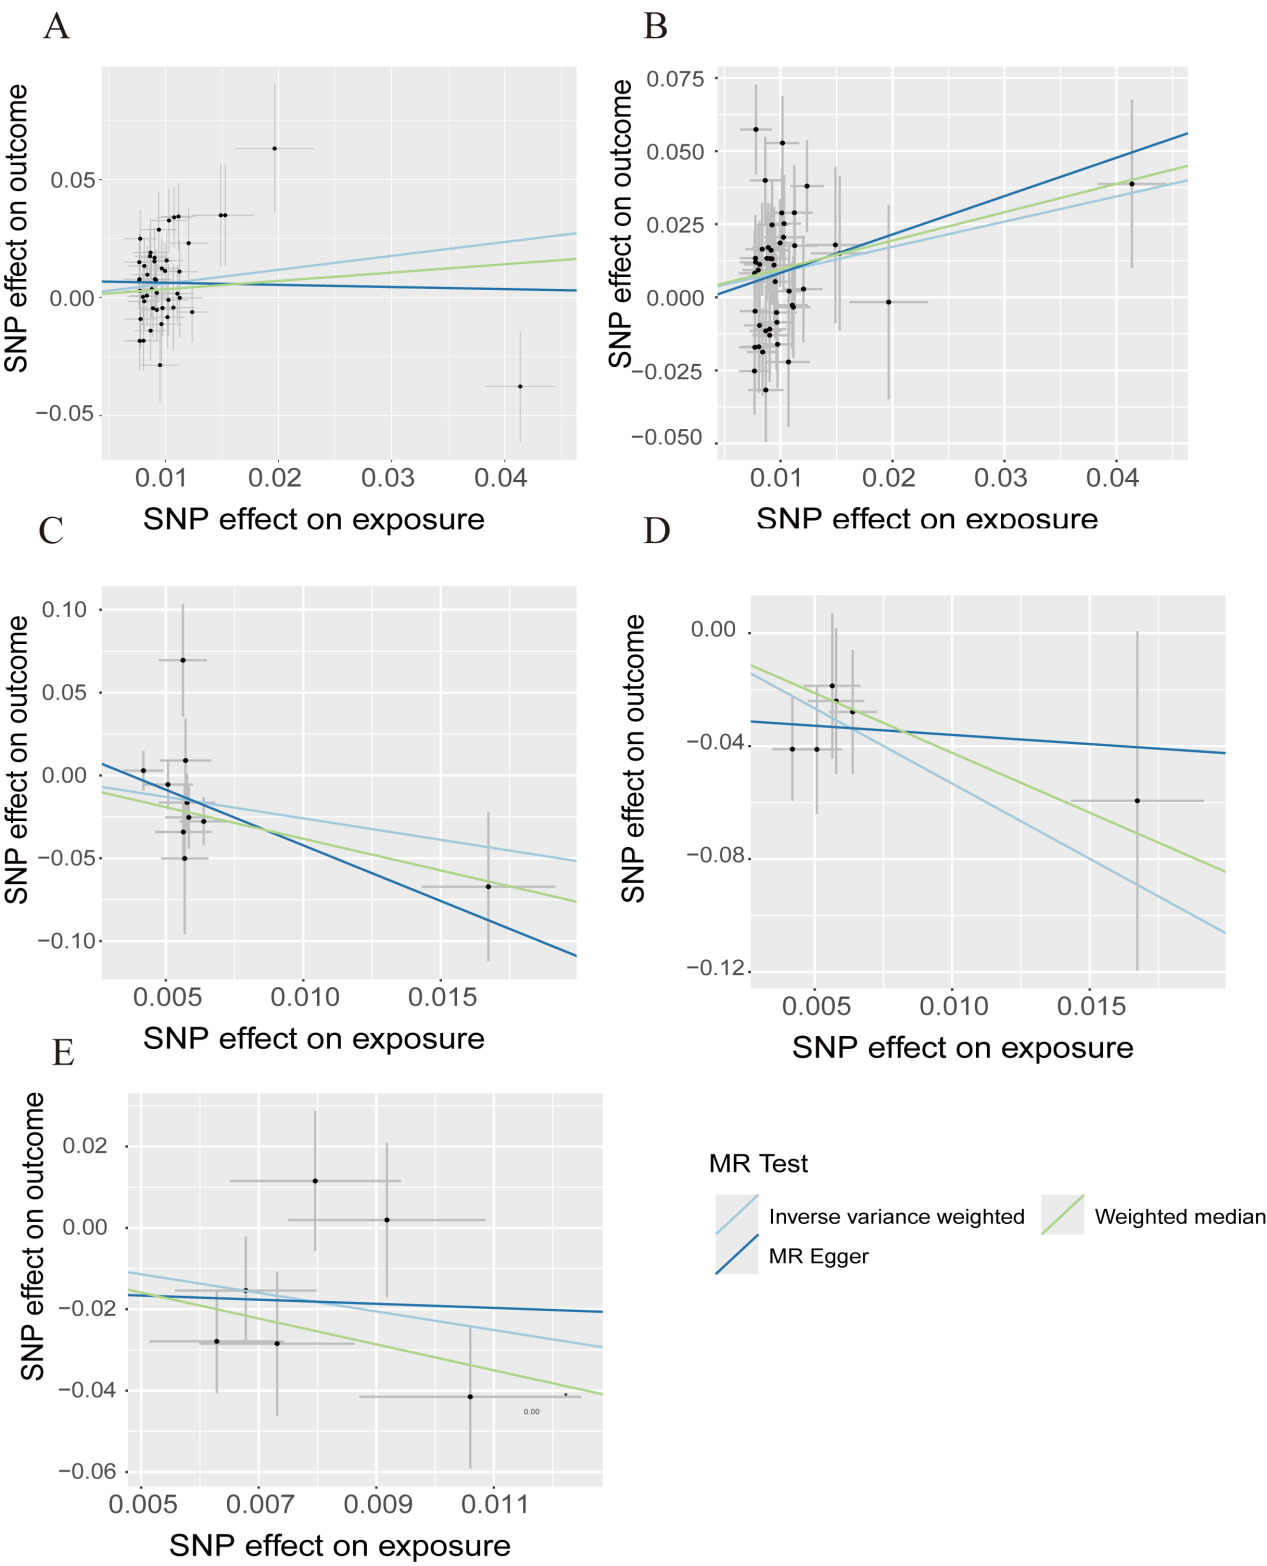


Figure S2. Scatter plot of the causal relationship, primarily evaluated using the IVW method.A:insomnia and endometriosis B: insomnia and abnormal menstruation C: long sleep duration and endometriosis. D: long sleep duration and menopause age. E:strenuous sports and female infertility.


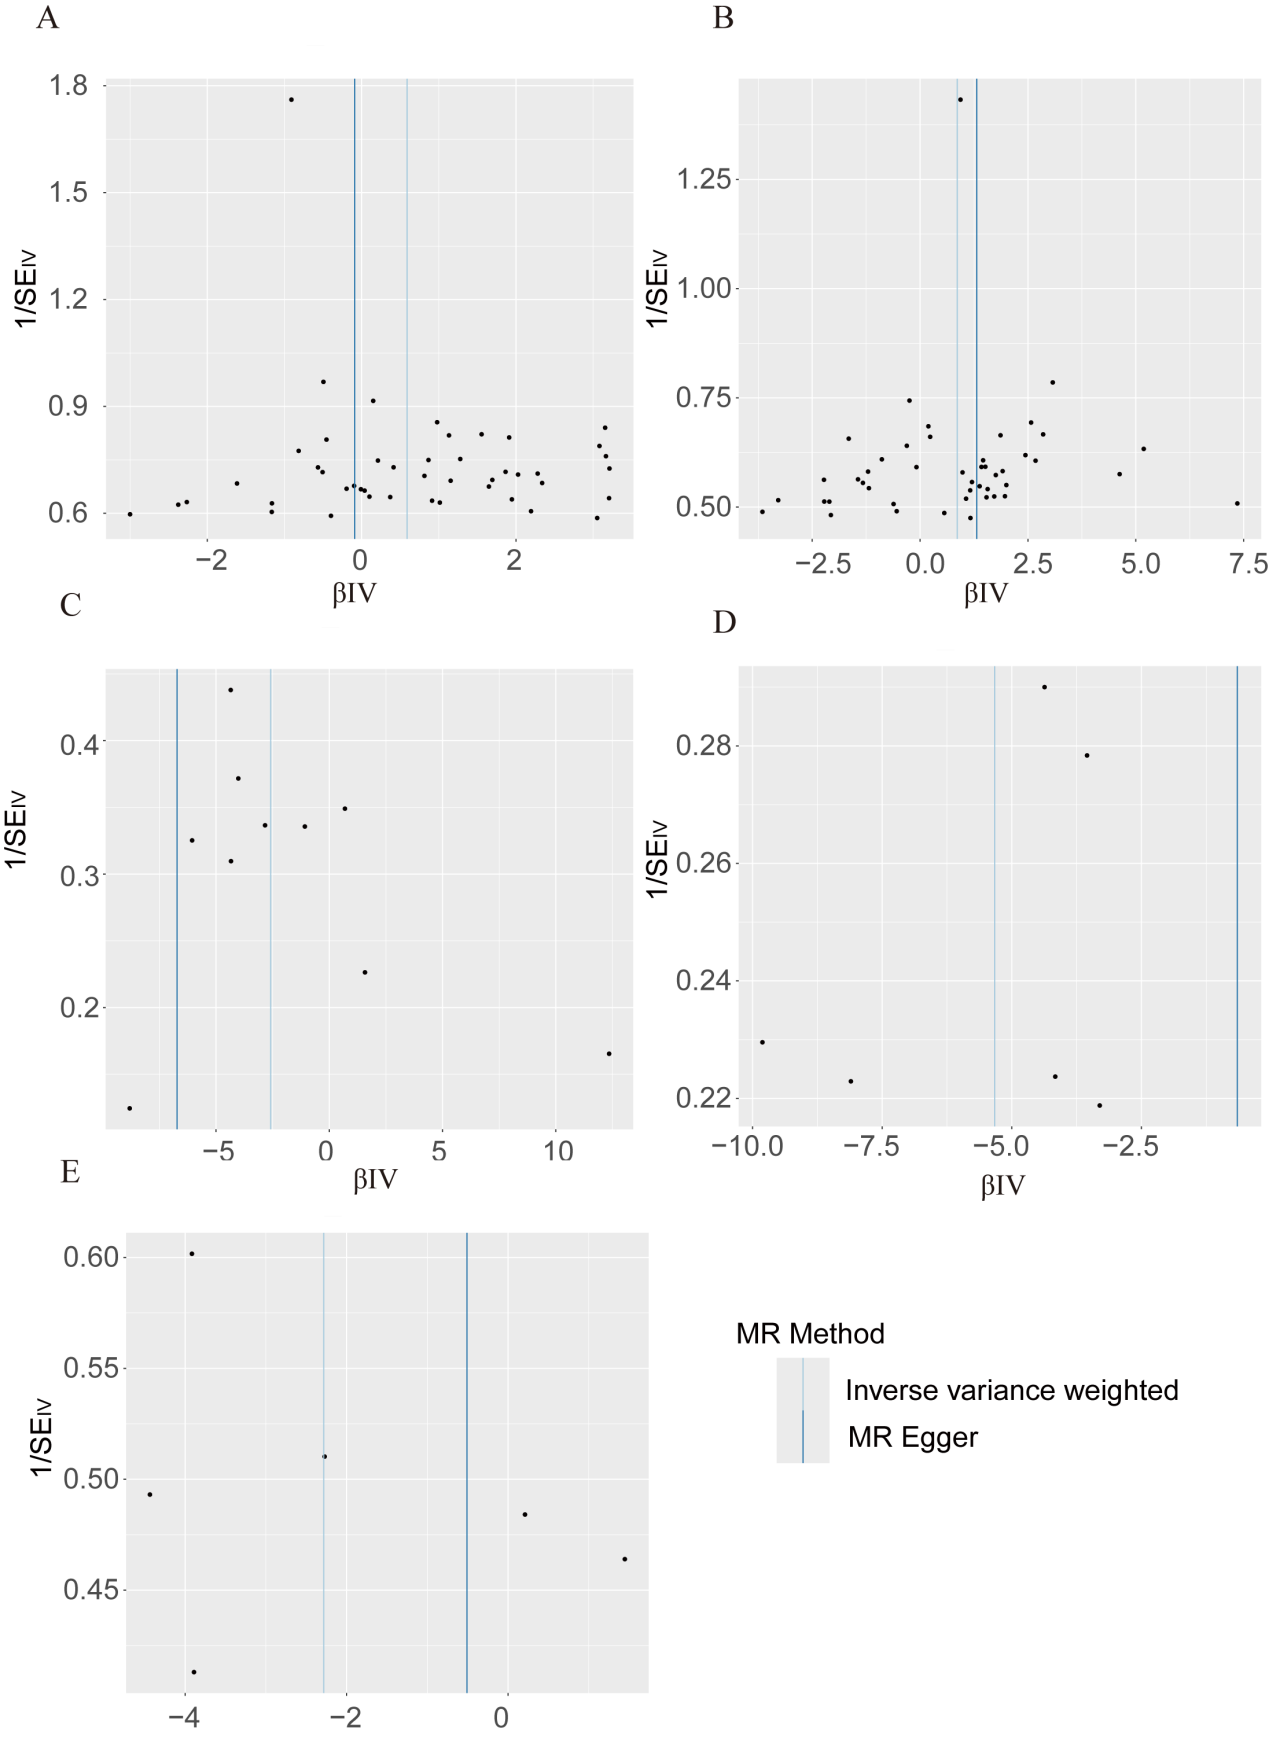


Figure S3 Funnel plot of the causal relationship of the causal relationship,A:insomnia and endometriosis. B: insomnia and abnormal menstruation. C: long sleep duration and endometriosis. E: long sleep duration and menopause age. F:strenuous sports and female infertility.
